# Supplementary material for: Causal network localization of brain stimulation targets for trait anxiety
Source: Research Square preprint supplement (doi:10.21203/rs.3.rs-4221074/v1), 2024-04-09
Supplement: Supplementary file 1 [file 79420f681ee1e610937e8a50.docx]

**Appendix S1: Dataset descriptions.** Datasets included in the study are described below.

**Normative connectivity with TMS:** These datasets included patients who received TMS with incidental variability in stimulation site (Fig. 1a, left) due to scalp-based targeting in clinical practice. Connectivity was of each site was estimated using a normative connectome database. Anxiety metrics were not included in the original study, so anxiety outcomes were defined based on data-driven clustering as in our prior work (Siddiqi et al., AJP 2020).

1. Boston: 30 patients received routine clinical TMS for MDD. Before treatment, they completed a structural MRI scan. MRI-guided neuronavigation was used to localize the incidental stimulation site.
2. OPT-TMS: 81 patients enrolled in a clinical trial of TMS for MDD. Before treatment, they completed a structural MRI scan. During the MRI, a Vitamin E capsule was placed over the stimulation site in order to enable subsequent localization.

**Normative connectivity of Lesions:** These datasets included patients who were phenotyped after a brain lesion. The majority of patients did not develop depression or anxiety. Because no pre-lesion scores were available, these datasets assume that pre-lesion anxiety is randomly distributed with respect to lesion location.

1. VHIS: 181 US Army Veterans from the Vietnam Head Injury Study completed a head CT scan before extensive behavioral phenotyping. At the end of the phenotyping battery, the rater gave the participant a score on 27 different behavioral metrics as part of the Neurobehavioral Rating Scale (NBRS). These metrics included depression and anxiety. Each participant was scored on a scale of 0 (“not present”) to 6 (“extremely severe”).
2. Cologne: 270 patients completed the Hospital Anxiety and Depression Scale 6 months after suffering a stroke.

**Individualized connectivity with TMS:** The THREE-D dataset included 400 patients who received TMS targeted to a standard location. This TMS target was based on prior studies in which the stimulation site was optimized based on normative negative connectivity to the subgenual cingulate cortex. 300 of these patients completed a baseline resting-state fMRI scan and also had complete data for depression (Hamilton Depression Rating Scale) and anxiety (brief symptom inventory for anxiety). While there was no variability in the stimulation site, there was incidental variability in connectivity of the standard site.

**Normative connectivity with DBS:** These datasets included patients who received DBS to the subthalamic nucleus (STN) for Parkinson’s disease. Incidentally, the STN includes regions that are both positively and negatively connected to the anxiety circuit. DBS sites were localized using postoperative neuroimaging.

1. Pittsburgh: 36 patients completed the Zung anxiety scale and the Beck Depression Inventory (BDI) before DBS and several months after DBS. The follow-up date varied between patients.
2. St. Louis: 38 participants completed the State-trait anxiety inventory and the BDI before DBS and six months after DBS.

**Table S1: Alternative models**. For 64 ROIs associated with different approaches to anxiety treatment, we computed the correlation between stimulation site connectivity to that ROI and improvement in anxiety, controlling for depression.

|  | **Normative TMS** (n=111) | **Individualized TMS** (n=300) | **Normative DBS** (n=74) |
| --- | --- | --- | --- |
|  | | | |
| **Anxiety circuit (out-of-sample)** | **0.323** | **0.140** | **0.344** |
|  | | | |
| **Voxel lesion symptom map** | 0.271 | 0.003 | N/A* |
|  | | | |
| **Receptor distribution maps (Hansen et al., 2022)** | | | |
| Serotonin 5-HT1A | -0.099 | -0.023 | 0.047 |
| Serotonin 5-HT1B (Savli) | -0.344 | -0.054 | 0.079 |
| Serotonin 5-HT1B (Gallezot) | -0.331 | -0.043 | -0.003 |
| Serotonin 5-HT2A | -0.041 | -0.026 | 0.118 |
| Serotonin 5-HT6 | -0.234 | -0.028 | -0.261 |
| Serotonin 5-HT transporter (Savli) | -0.202 | 0.003 | 0.064 |
| Serotonin 5-HT transporter (Fazio) | -0.263 | -0.004 | 0.309 |
| Nicotinic acetylcholine α4β2 | -0.299 | 0.020 | 0.130 |
| Cannabinoid CB1 | -0.164 | 0.010 | -0.164 |
| Dopamine D1 | -0.210 | -0.033 | 0.130 |
| Dopamine D2 (Smith) | -0.264 | -0.010 | -0.082 |
| Dopamine D2 (San Diego) | -0.268 | -0.022 | 0.121 |
| Dopamine D2 (Alakurtti) | -0.287 | -0.055 | 0.001 |
| Dopamine transporter (Sasaki) | -0.313 | -0.022 | -0.121 |
| Dopamine transporter (Dukart) | -0.246 | -0.005 | 0.037 |
| F-dopa | -0.198 | -0.018 | 0.081 |
| GABAA | -0.240 | -0.056 | 0.019 |
| Histamine H3 | -0.285 | -0.002 | -0.046 |
| Muscarinic M1 | -0.207 | -0.033 | -0.159 |
| Mu opioid (Kantonen) | -0.281 | 0.016 | 0.220 |
| Mu opioid (Turtonen) | 0.237 | 0.019 | 0.076 |
| Norepinephrine transporter (Hesse) | -0.299 | -0.021 | 0.093 |
| Norepinephrine transporter (Ding) | -0.330 | -0.021 | 0.054 |
| NMDA glutamate | -0.258 | -0.018 | 0.159 |
| Vesicular acetylcholine transporter | -0.290 | -0.007 | 0.087 |
| Glutamate mGluR5 (Rosaneto) | -0.288 | -0.029 | -0.179 |
| Glutamate mGluR5 (DuBois) | -0.238 | -0.026 | -0.082 |
|  | | | |
| **Anxiety neuroimaging meta-analysis (Chavanne et al., 2000)** | | | |
| Induced anxiety - GAD | -0.310 | -0.139 | 0.000 |
| Induced anxiety - panic disorder/agoraphobia | -0.313 | -0.009 | -0.195 |
| Induced anxiety- PTSD | -0.300 | -0.071 | 0.000 |
| Induced anxiety – social anxiety disorder | -0.306 | -0.043 | 0.000 |
| Induced anxiety – specific phobia | -0.321 | 0.008 | -0.080 |
| Induced anxiety - transdiagnostic | -0.313 | -0.035 | 0.000 |
| Pathological anxiety - GAD | 0.217 | -0.016 | 0.119 |
| Pathological anxiety – panic disorder/agoraphobia | 0.206 | -0.005 | 0.096 |
| Pathological anxiety – PTSD | -0.270 | -0.064 | -0.251 |
| Pathological anxiety – social anxiety disorder | -0.126 | -0.106 | 0.119 |
| Pathological anxiety – specific phobia | -0.341 | -0.025 | 0.082 |
| Pathological anxiety - transdiagnostic | -0.290 | -0.034 | 0.028 |
|  | | | |
| **Neurosynth automated meta-analysis of search terms (Yarkoni et al., 2011)** | | | |
| Addiction | 0.092 | 0.053 | N/A* |
| Anxiety | 0.240 | -0.016 | N/A* |
| Attention Deficit | 0.266 | 0.055 | N/A* |
| Autism | 0.261 | 0.050 | N/A* |
| Bipolar | 0.303 | 0.060 | N/A* |
| Depression | 0.321 | 0.039 | N/A* |
| Eating (i.e. eating disorders) | -0.118 | 0.002 | N/A* |
| Epilepsy | 0.279 | 0.029 | N/A* |
| Injury (i.e. traumatic brain injury) | -0.295 | 0.009 | N/A* |
| Obsessive (i.e. OCD) | 0.232 | 0.037 | N/A* |
| PTSD | 0.241 | 0.029 | N/A* |
| Pain | -0.319 | -0.071 | N/A* |
| Parkinson | -0.343 | -0.013 | N/A* |
| Sexual | 0.125 | 0.034 | N/A* |
| Sleep | -0.325 | 0.037 | N/A* |
|  | | | |
| **TMS sites commonly used for anxiety** | | | |
| H1 | -0.308 | -0.055 | N/A* |
| H7 | -0.144 | 0.009 | N/A* |
| Right 5 cm | 0.327 | 0.077 | N/A* |
| Right anti-sgACC | -0.252 | -0.045 | N/A* |
| Left 5 cm | 0.315 | 0.068 | N/A* |
| Left anti-sgACC | -0.316 | N/A** | N/A* |

*The noted ROI could not be compared to DBS site location because the ROI did not overlap with the STN, and thus had no overlap with the DBS sites in the study.

**The left anti-sgACC target was not analyzed in the THREE-D dataset because all participants were prospectively stimulated at the left anti-sgACC target.
